# Supplementary material
Source: Royal Society of Chemistry journal article supplement (doi:10.1039/d5cp04823k)
Supplement: d5cp04823k1.pdf [file d5cp04823k1.pdf]

## Supporting Information

### **Reversible switching of half-metallicity and magnetic order in 2D FeI<sub>2</sub>/Al<sub>2</sub>Te<sub>3</sub> van der Waals multiferroics tailored by ferroelectric polarization**

Guoan Ding <sup>a</sup>, Zhijian He <sup>a</sup>, Shuhong Xie <sup>a,\*</sup>, Daifeng Zou <sup>b,\*</sup>

*a Key Laboratory of Low Dimensional Materials and Application Technology of Ministry of Education,  
School of Materials Science and Engineering, Xiangtan University, Xiangtan 411105, China*

*b School of Physics and Electronic Science, Hunan University of Science and Technology, Xiangtan  
411201, China*

\* Corresponding authors.

*E-mail addresses:* shxie@xtu.edu.cn (S. Xie), zoudaifeng@hnust.edu.cn (D. Zou).

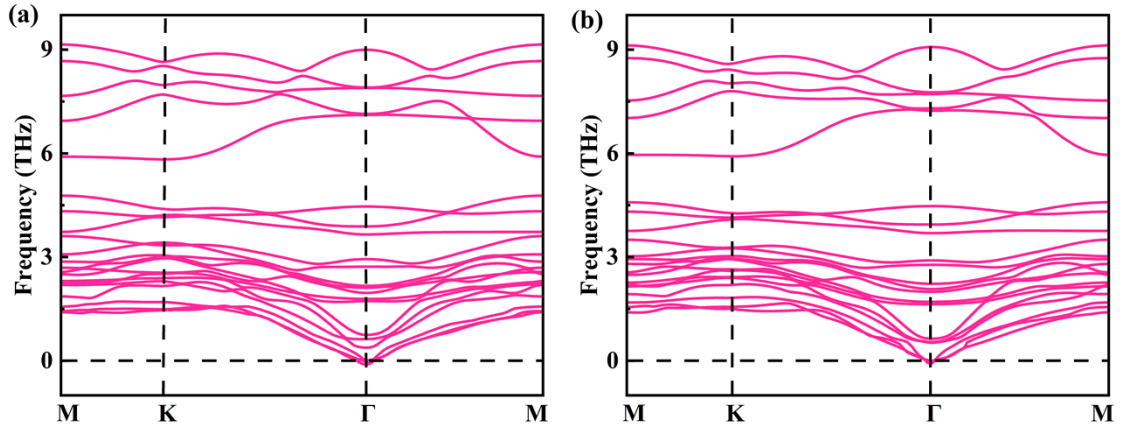

Figure S1. Phonon spectrums of heterostructures (a) type III  $P\uparrow$  and (b) type VI  $P\downarrow$ .

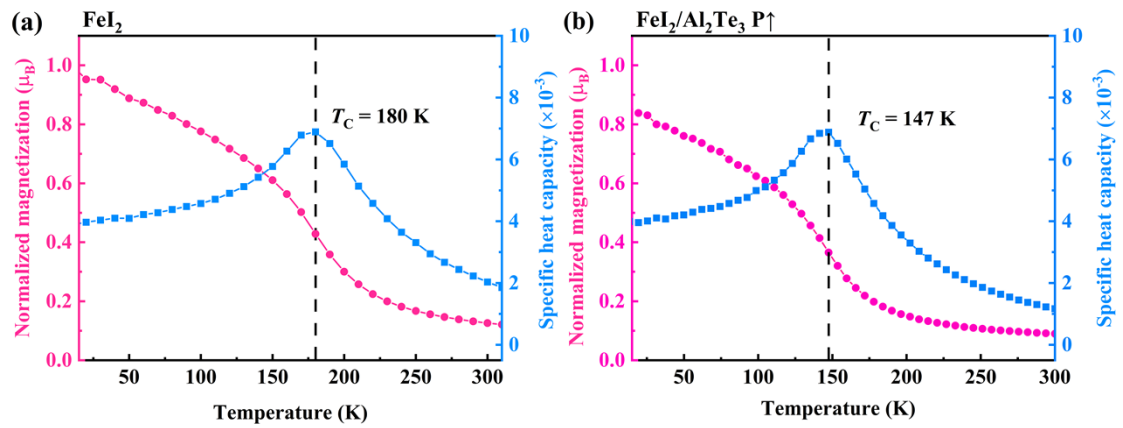

Figure S2. Temperature dependence of the normalized magnetization and specific heat capacity for: (a) the isolated  $\text{FeI}_2$  monolayer, (b) the  $\text{FeI}_2/\text{Al}_2\text{Te}_3$  heterostructure under  $P\uparrow$  polarization.

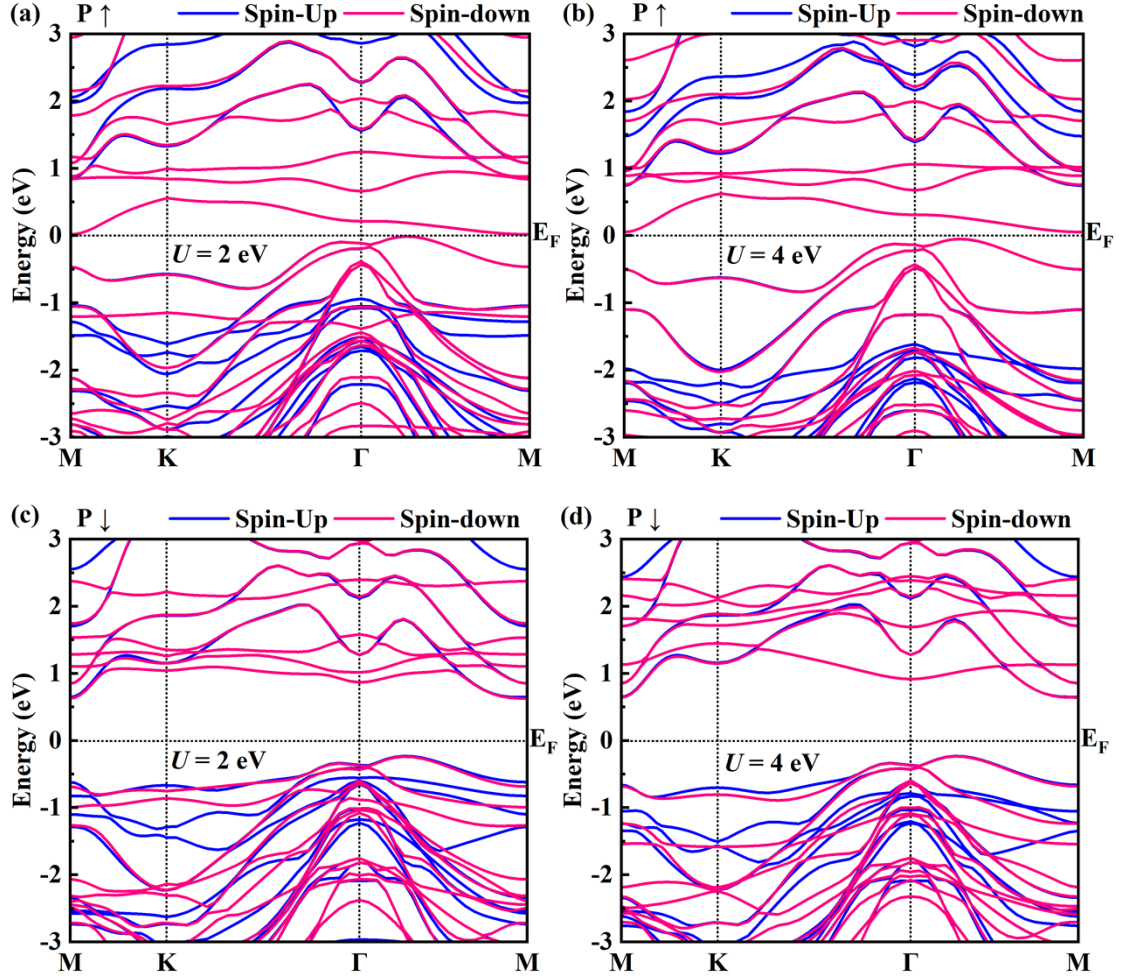

Figure S3. The comparisons of the spin-resolved band structures of (a)-(b) type III  $P \uparrow$  and (c)-(d) type VI  $P \downarrow$  under different  $U$  values.

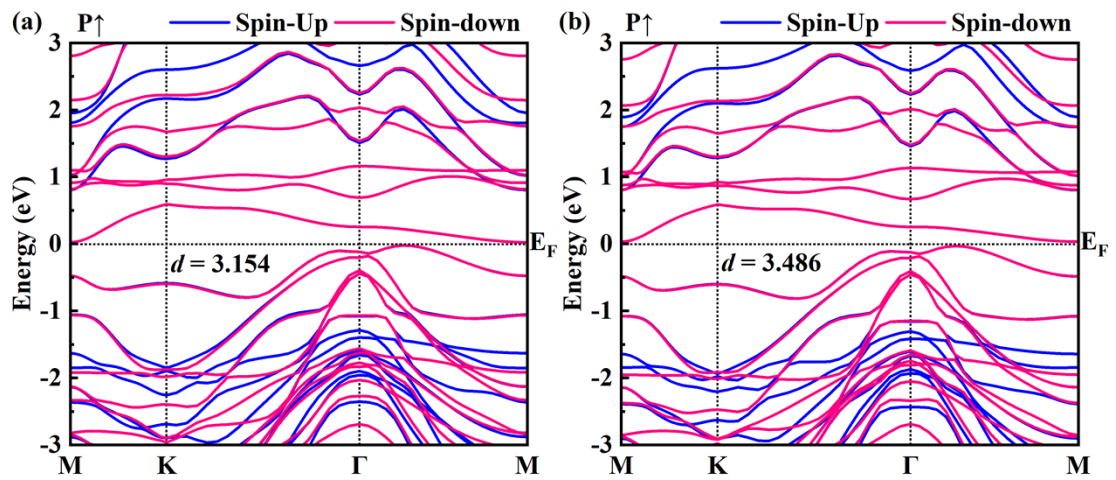

Figure S4. Band structures of type III  $P \uparrow$  calculated at  $U = 3$  eV for different interlayer spacings: (a)  $d = 3.154$ , (b)  $d = 3.486$ .

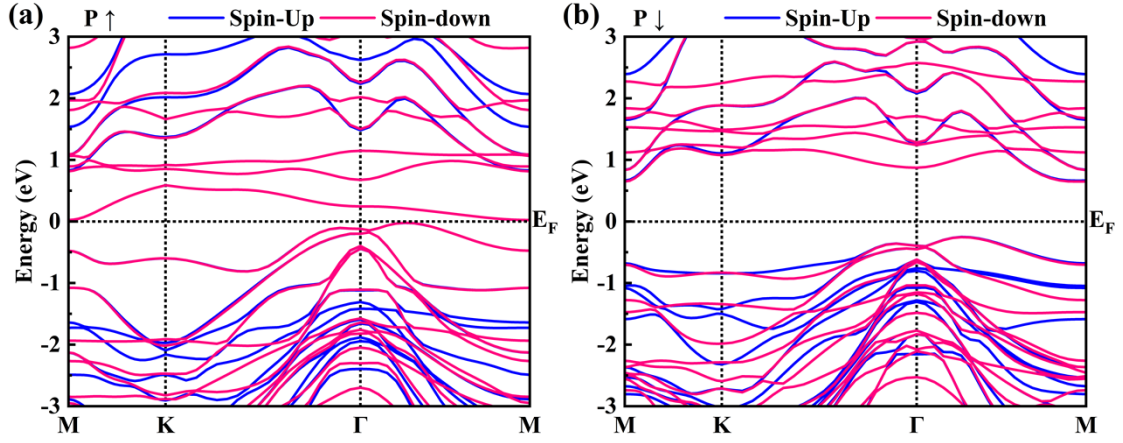

Figure S5. Band structures of (a) type I  $P\uparrow$  and (b) type IV  $P\downarrow$  calculated at  $U = 3$  eV.

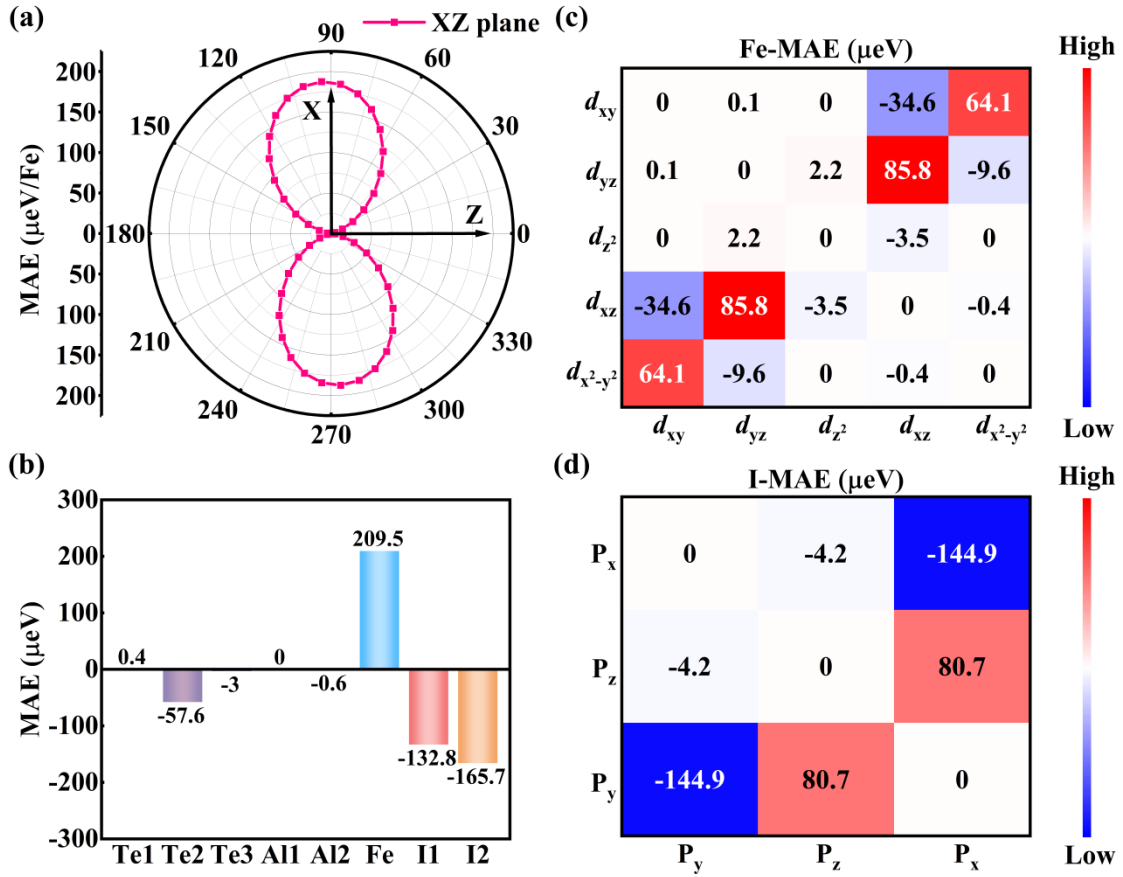

Figure S6. (a) Evolution of the MAE for the type I  $P\uparrow$  in the  $FeI_2/Al_2Te_3$  heterostructure, within the  $xz$ -plane. (b) Atoms-resolved MAE for the type I  $P\uparrow$  in the  $FeI_2/Al_2Te_3$  heterostructure. Orbital-resolved MAE of (c) Fe atoms and (d) I2 atoms for the type I  $P\uparrow$  in the  $FeI_2/Al_2Te_3$  heterostructure.

Table S1. The  $d_{\text{Fe-Fe}}$  and  $\theta$  represent the Fe-Fe distance and Fe-I-Fe angle, the energy differences ( $\Delta E = E_{\text{AFM}} - E_{\text{FM}}$ ) between the FM and AFM configurations, the magnetic moment of Fe is represented by  $M_{\text{Fe}}$ , and MAE represents the magnetocrystalline anisotropy energy of the type I P $\uparrow$  and type IV P $\downarrow$  in the FeI<sub>2</sub>/Al<sub>2</sub>Te<sub>3</sub> heterostructures.

|                        | $d_{\text{Fe-Fe}}$ (Å) | $\theta$ (deg) | $\Delta E$ (eV) | $M_{\text{Fe}}$ ( $\mu_{\text{B}}$ ) | MAE ( $\mu\text{eV}/\text{Fe}$ ) |
|------------------------|------------------------|----------------|-----------------|--------------------------------------|----------------------------------|
| Type I P $\uparrow$    | 4.08                   | 91.9           | 0.067           | 3.535                                | 209.5                            |
| Type IV P $\downarrow$ | 4.08                   | 91.5           | -0.039          | 3.575                                | 257.7                            |
